# Supplementary material for: Lattice oxygen of PbO2 induces crystal facet dependent electrochemical ozone production
Source: Royal Society of Chemistry journal article supplement (doi:10.1039/d0ta12277g), 2021-01-01
Supplement: d0ta12277g1.pdf [file d0ta12277g1.pdf]

## Electronic Supplementary Information (ESI)

### Lattice Oxygen of PbO<sub>2</sub> Induces Crystal Facet Dependent Electrochemical Ozone Production

*Wenbin Jiang<sup>†</sup>, Shibin Wang<sup>†</sup>, Jia Liu<sup>†</sup>, Haiyang Zheng, Yu Gu, Wenwen Li,*

*Huaijie Shi, Suiqin Li, Xing Zhong\*, Jianguo Wang\**

Institute of Industrial Catalysis, College of Chemical Engineering, State Key  
Laboratory Breeding Base of Green-Chemical Synthesis Technology, Zhejiang  
University of Technology, Hangzhou 310032 China.

<sup>†</sup>W.B. Jiang, S.B. Wang and J. Liu contribute to this work equally

\*Correspondence and requests for materials should be addressed to X.Z. (email:  
zhongx@zjut.edu.cn) or to J.G.W. (email: jgw@zjut.edu.cn).

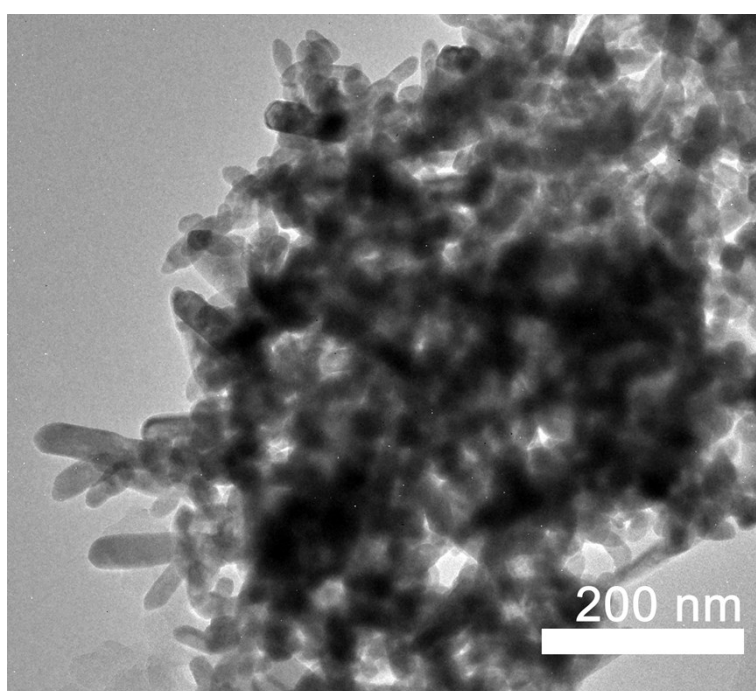

**Fig. S1.** TEM image of the  $\beta$ -PbO<sub>2</sub>-120 NRs.

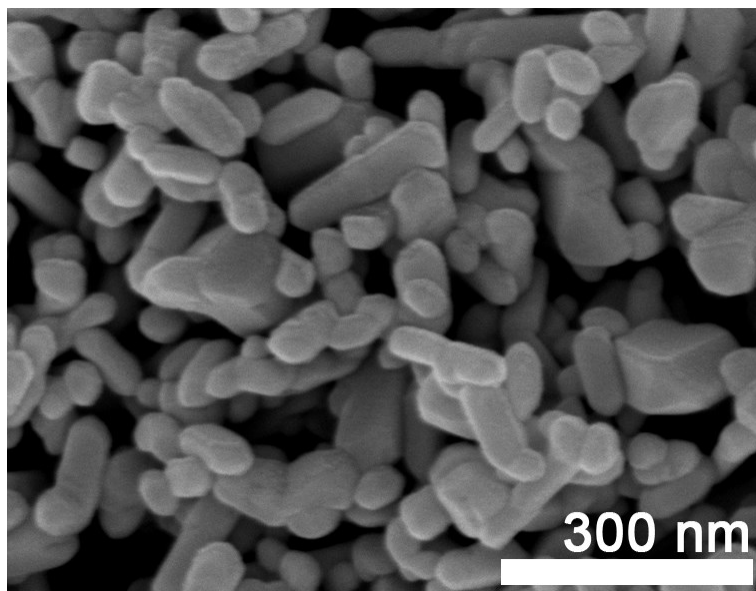

**Fig. S2.** SEM image of the  $\beta$ -PbO<sub>2</sub>-150 NRs.

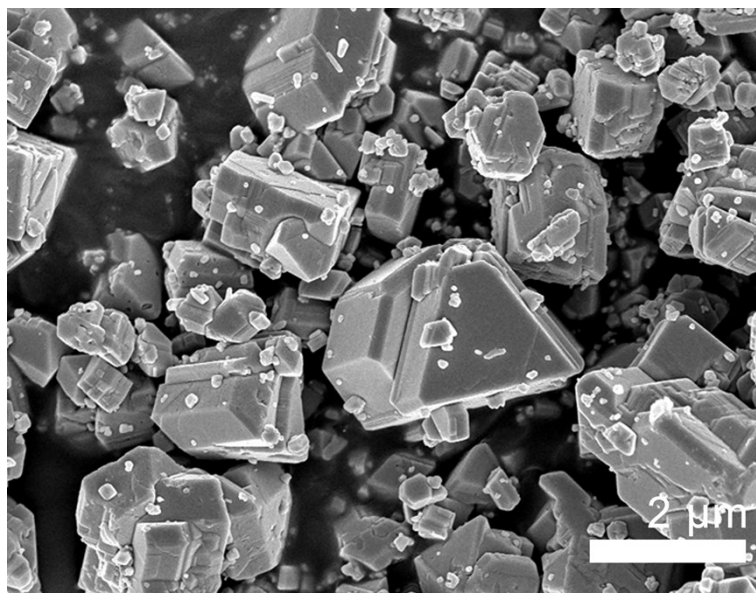

**Fig. S3.** SEM image of the  $\beta$ -PbO<sub>2</sub>-CM.

---

**Table S1.** The relative concentration of different Pb species based on XPS of the  $\beta$ -PbO<sub>2</sub>-120 NRs,  $\beta$ -PbO<sub>2</sub>-150 NRs and the  $\beta$ -PbO<sub>2</sub>-CM.

| Samples                            | Relative concentration of different Pb species (area %) |                 |
|------------------------------------|---------------------------------------------------------|-----------------|
|                                    | Pb <sup>4+</sup>                                        | Pb <sup>0</sup> |
| $\beta$ -PbO <sub>2</sub> NRs      | 79.89                                                   | 20.10           |
| $\beta$ -PbO <sub>2</sub> -150 NRs | 79.83                                                   | 20.17           |
| $\beta$ -PbO <sub>2</sub> -CM      | 60.40                                                   | 39.59           |

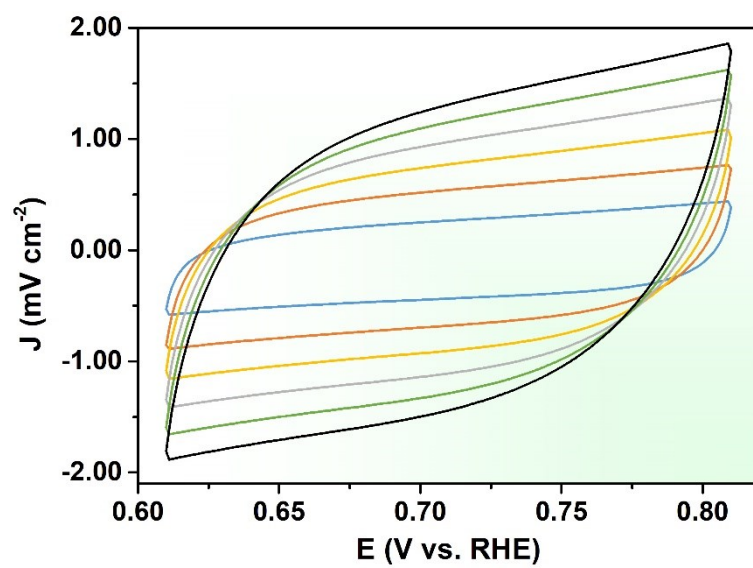

**Fig. S4.** Cyclic voltammetry curves at various scan rates of the  $\beta\text{-PbO}_2\text{-120}$  NRs at various scan rates of 20, 40, 60, 80, 100, and 120  $\text{mV/s}$  in saturated  $\text{K}_2\text{SO}_4$  solution.

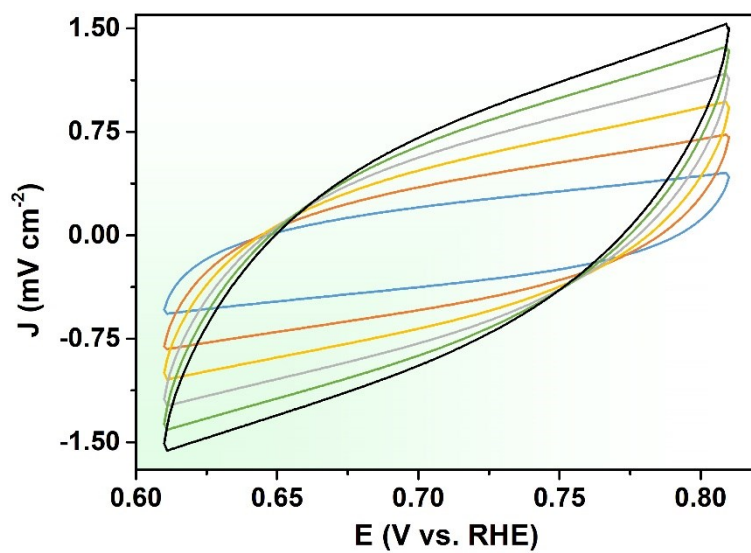

**Fig. S5.** Cyclic voltammetry curves at various scan rates of the  $\beta$ - $\text{PbO}_2$ -150 NRs at various scan rates of 20, 40, 60, 80, 100, and 120  $\text{mV/s}$  in saturated  $\text{K}_2\text{SO}_4$  solution.

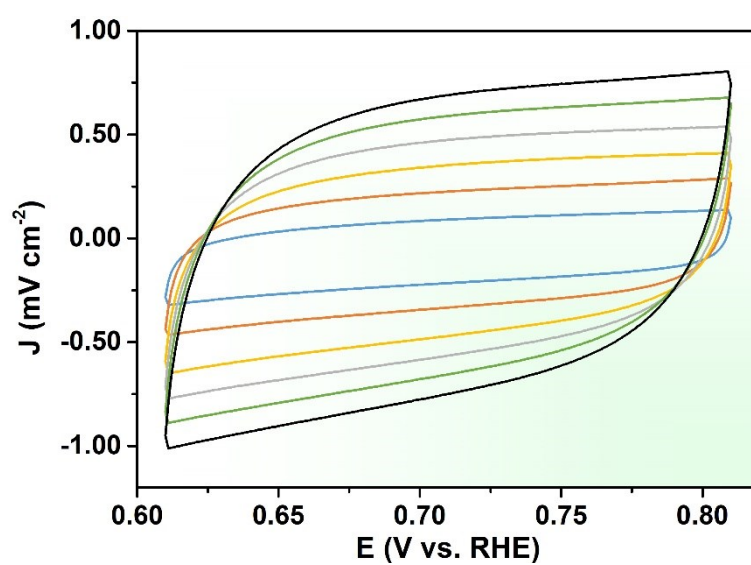

**Fig. S6.** Cyclic voltammetry curves at various scan rates of the  $\beta\text{-PbO}_2\text{-CM}$  at various scan rates of 20, 40, 60, 80, 100, and 120  $\text{mV/s}$  in saturated  $\text{K}_2\text{SO}_4$  solution.



**Table S2.** Comparison of EOP performance for of the  $\beta$ -PbO<sub>2</sub>-120 NRs,  $\beta$ -PbO<sub>2</sub>-150 NRs and the  $\beta$ -PbO<sub>2</sub>-CM..

| <b>Catalysts<sup>a)</sup></b>                     | <b>Tafel Slope<sup>b)</sup></b><br><b>(mV/dec)</b> | <b>J<sub>0, geometric</sub><sup>c)</sup></b><br><b>(mA/cm<sup>2</sup>)</b> | <b>C<sub>dl</sub></b><br><b>(mF/cm<sup>2</sup>)</b> | <b>Relative</b><br><b>surface area</b> | <b>J<sub>0, normalized</sub></b><br><b>(mA/cm<sup>2</sup>)</b> |
|---------------------------------------------------|----------------------------------------------------|----------------------------------------------------------------------------|-----------------------------------------------------|----------------------------------------|----------------------------------------------------------------|
| <b><math>\beta</math>-PbO<sub>2</sub>-120 NRs</b> | 1791.8                                             | 742.3                                                                      | 40.76                                               | 1.80                                   | 412.4                                                          |
| <b><math>\beta</math>-PbO<sub>2</sub>-150 NRs</b> | 1515.2                                             | 411.5                                                                      | 21.22                                               | 0.93                                   | 440.2                                                          |
| <b><math>\beta</math>-PbO<sub>2</sub>-CM</b>      | 1561.4                                             | 493.2                                                                      | 22.70                                               | 1.00                                   | 493.2                                                          |

a) All the parameters were measured under the same conditions. b) The higher current densities of Tafel slopes were taken to calculate. c) Exchange current densities (J<sub>0</sub>) were obtained from Tafel curves by using extrapolation methods.

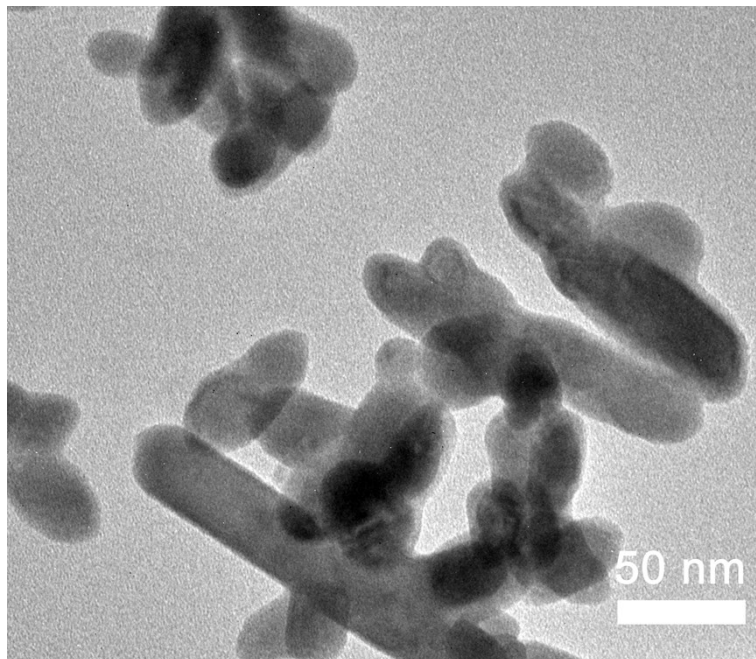

**Fig. S7.** TEM image of the  $\beta$ -PbO<sub>2</sub>-120 NRs after EOP stability test for 50 h in the MEA electrolyzer.

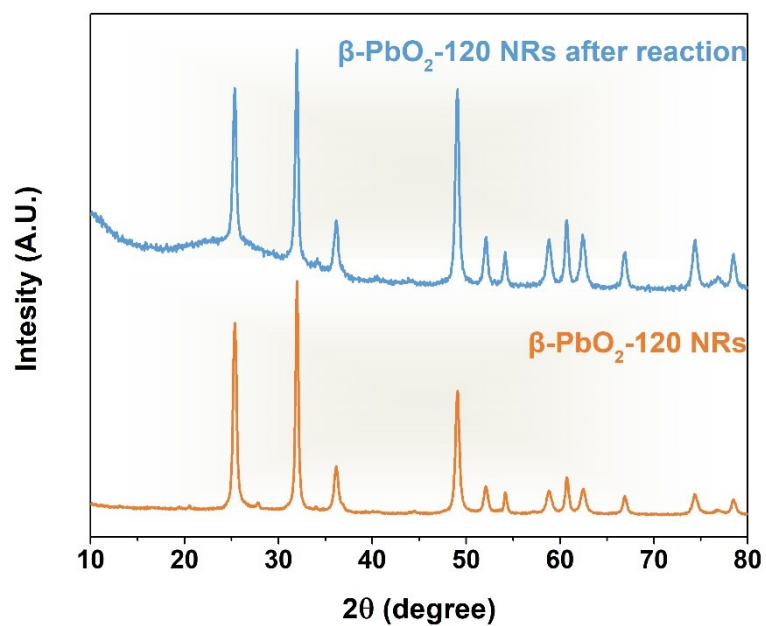

**Fig. S8.** XRD patterns for the  $\beta$ -PbO<sub>2</sub>-120 NRs and the  $\beta$ -PbO<sub>2</sub>-120 NRs after EOP stability test for 50 h in the MEA electrolyzer.

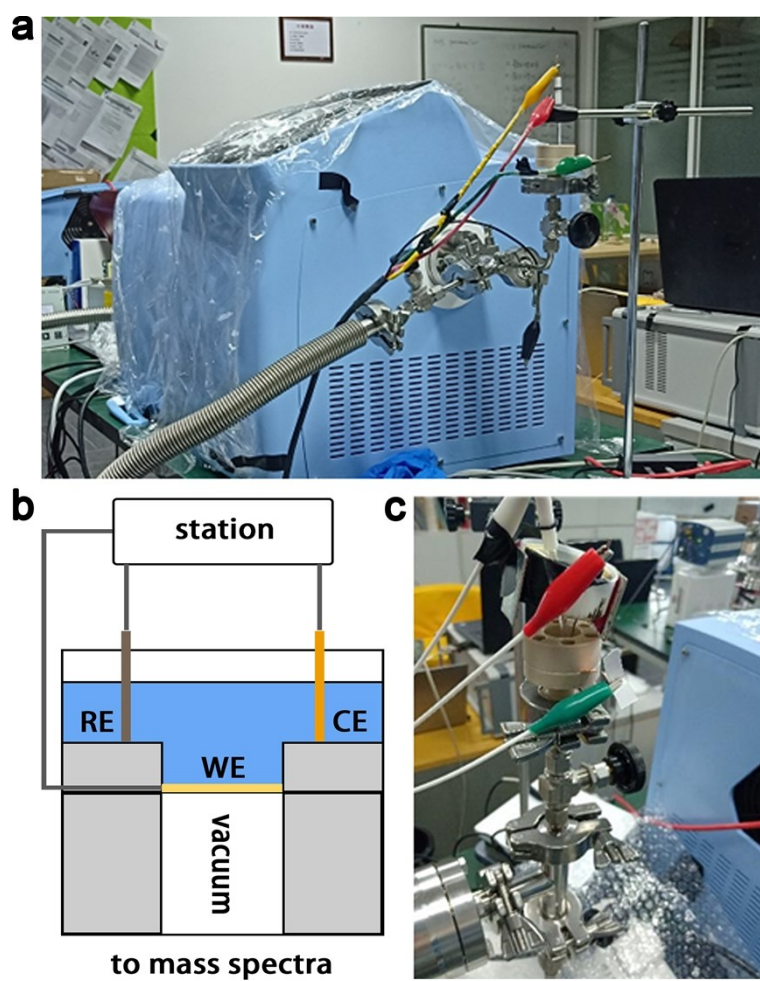

**Fig. S9.** a) The photograph of the DEMS technique with mass spectra. b) The schematic illustration of the DEMS technique. c) The photograph of the electrolysis cell for DMES measurement.

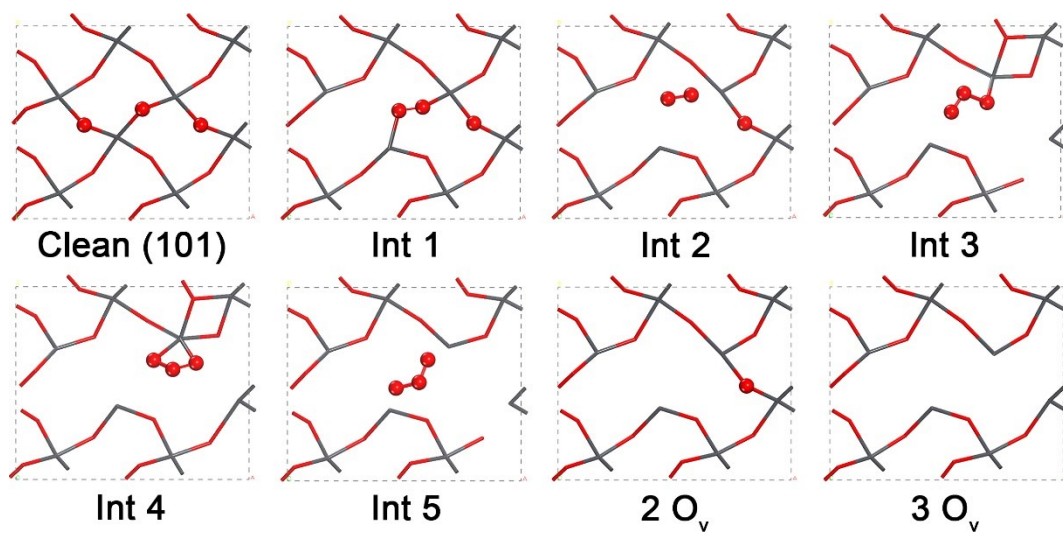

**Fig. S10.** Optimized structures of the reaction intermediates in surface lattice oxygen coupling to  $\text{O}_2/\text{O}_3$  on the  $\text{PbO}_2$  (101) surface.

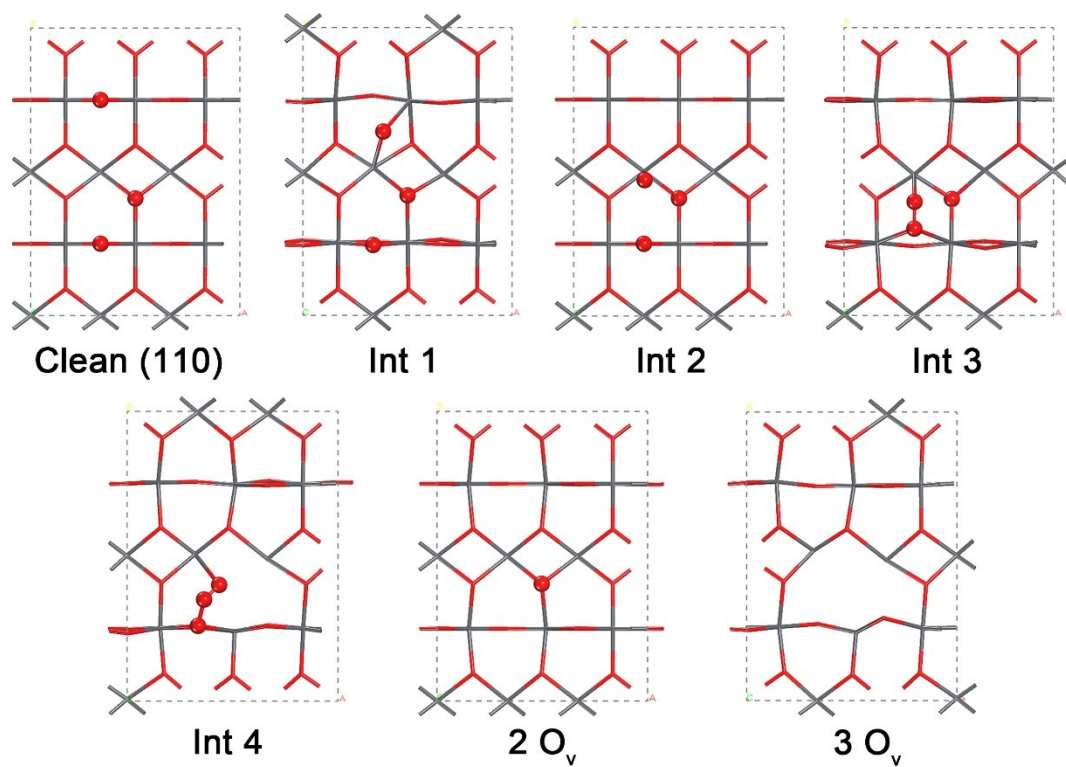

**Fig. S11.** Optimized structures of the reaction intermediates in surface lattice oxygen coupling to O<sub>2</sub>/O<sub>3</sub> on the PbO<sub>2</sub> (110) surface.

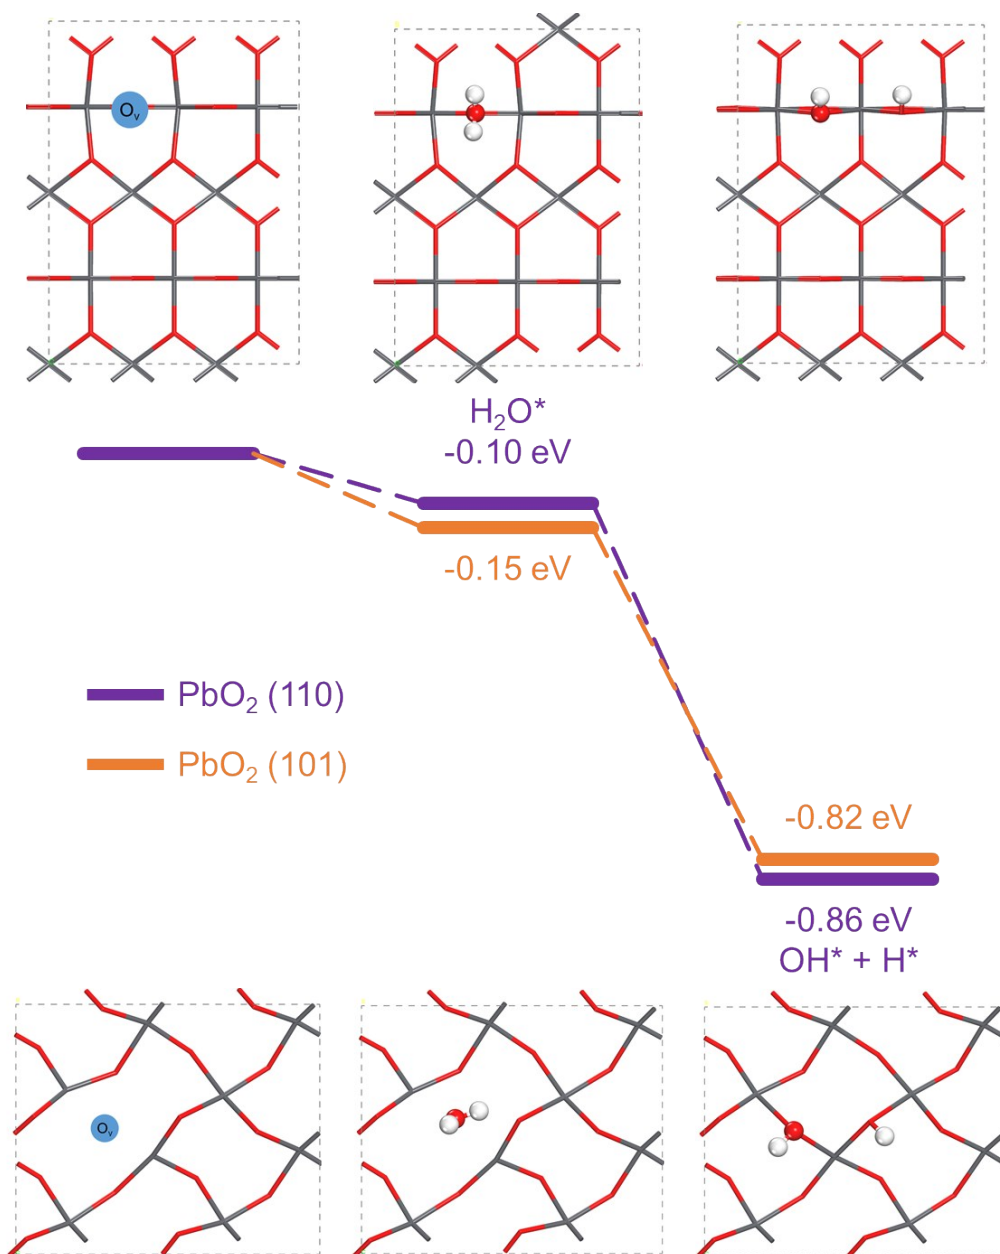

**Fig. S12.** The free energy diagram (298K) and optimized structures for H<sub>2</sub>O adsorption and dissociation on the PbO<sub>2</sub> (101) and the PbO<sub>2</sub> (110) surface.

**Table S3.** Calculated Gibbs reaction energies ( $\Delta G_r$ ) and energy barriers ( $\Delta G_a$ ) for elementary steps in surface lattice oxygen coupling to  $O_2/O_3$  on the  $PbO_2$  (101) and the  $PbO_2$  (110) surface.

|                                                                                     | $\Delta G_r$ (eV) | $\Delta G_a$ (eV) |
|-------------------------------------------------------------------------------------|-------------------|-------------------|
| (110): $3 O_{latt}^* \rightarrow O^* (bri) + 2 O_{latt}^* + O_v$                    | 0.73              | –                 |
| (110): $O^* (bri) + 2 O_{latt}^* + O_v \rightarrow O^* (top) + 2 O_{latt}^* + O_v$  | 0.42              | –                 |
| (110): $O^* (top) + 2 O_{latt}^* + O_v \rightarrow O_2^* + O_{latt}^* + 2 O_v$      | -1.91             | 0.11              |
| (110): $O_2^* + O_{latt}^* + 2 O_v \rightarrow O_3^* + 3 O_v$                       | 0.19              | 0.92              |
| (110): $O_2^* + O_{latt}^* + 2 O_v \rightarrow O_2 (gas) + O_{latt}^* + 2 O_v$      | -1.08             | –                 |
| (110): $O_3^* + 3 O_v + 2 O_v \rightarrow O_3 (gas) + 3 O_v$                        | 1.15              | –                 |
| (101): $3 O_{latt}^* \rightarrow O_2^* + O_{latt}^* + 2 O_v$                        | -1.20             | 0.74              |
| (101): $O_2^* + O_{latt}^* + 2 O_v \rightarrow O_2 (phys) + O_{latt}^* + 2 O_v$     | -0.44             | –                 |
| (101): $O_2 (phys) + O_{latt}^* + 2 O_v \rightarrow O_3^* (1) + 3 O_v$              | -0.05             | 0.41              |
| (101): $O_3^* (1) + 3 O_v \rightarrow O_3^* (2) + 3 O_v$                            | -0.17             | 0.08              |
| (101): $O_3^* (2) + 3 O_v \rightarrow O_3 (phys) + 3 O_v$                           | 0.47              | –                 |
| (101): $O_3^* (phys) + 3 O_v \rightarrow O_3 (gas) + 3 O_v$                         | -0.16             | –                 |
| (101): $O_2 (phys) + O_{latt}^* + 2 O_v \rightarrow O_2 (gas) + O_{latt}^* + 2 O_v$ | -0.40             | –                 |
